# Supplementary material
Source: publisher figshare collection journal article supplement (https://acs.figshare.com/ndownloader/files/5063803)
Supplement: Supplementary file 1 [file 5063803]

# ic052105e
# Biologically Relevant Phosphoranes: Structural Characterization of
# Glucofuranose and Xylofuranose Based Phosphoranes
#
# Natalya V. Timosheva, A.Chandrasekaran, Robert R. Holmes*
# Department of Chemistry, Univ. of  Massachusetts, Amherst, MA 01003-9336
# rrh@chem.umass.edu

data_ntp27(Compound=3)
 
_audit_creation_method            SHELXL-97 
_chemical_name_systematic 
; 
 ? 
; 
_chemical_name_common             ? 
_chemical_melting_point           ? 
_chemical_formula_moiety          ? 
_chemical_formula_sum 
 'C38 H56 F O7 P' 
_chemical_formula_weight          674.80 
 
loop_ 
 _atom_type_symbol 
 _atom_type_description 
 _atom_type_scat_dispersion_real 
 _atom_type_scat_dispersion_imag 
 _atom_type_scat_source 
 'C'  'C'   0.0033   0.0016 
 'International Tables Vol C Tables 4.2.6.8 and 6.1.1.4' 
 'H'  'H'   0.0000   0.0000 
 'International Tables Vol C Tables 4.2.6.8 and 6.1.1.4' 
 'O'  'O'   0.0106   0.0060 
 'International Tables Vol C Tables 4.2.6.8 and 6.1.1.4' 
 'F'  'F'   0.0171   0.0103 
 'International Tables Vol C Tables 4.2.6.8 and 6.1.1.4' 
 'P'  'P'   0.1023   0.0942 
 'International Tables Vol C Tables 4.2.6.8 and 6.1.1.4' 
 
_symmetry_cell_setting            Orthorhombic 
_symmetry_space_group_name_H-M    P2(1)2(1)2(1) 
 
loop_ 
 _symmetry_equiv_pos_as_xyz 
 'x, y, z' 
 '-x+1/2, -y, z+1/2' 
 'x+1/2, -y+1/2, -z' 
 '-x, y+1/2, -z+1/2' 
 
_cell_length_a                    9.88770(10) 
_cell_length_b                    10.1558(2) 
_cell_length_c                    37.7904(8) 
_cell_angle_alpha                 90.00 
_cell_angle_beta                  90.00 
_cell_angle_gamma                 90.00 
_cell_volume                      3794.82(12) 
_cell_formula_units_Z             4 
_cell_measurement_temperature     293(2) 
_cell_measurement_reflns_used     3615 
_cell_measurement_theta_min       4.08 
_cell_measurement_theta_max       25.03 
 
_exptl_crystal_description        block 
_exptl_crystal_colour             colorless 
_exptl_crystal_size_max           0.30 
_exptl_crystal_size_mid           0.20 
_exptl_crystal_size_min           0.15 
_exptl_crystal_density_meas       ? 
_exptl_crystal_density_diffrn     1.181 
_exptl_crystal_density_method     'not measured' 
_exptl_crystal_F_000              1456 
_exptl_absorpt_coefficient_mu     0.122 
_exptl_absorpt_correction_type    ? 
_exptl_absorpt_correction_T_min   0.9642 
_exptl_absorpt_correction_T_max   0.9819 
_exptl_absorpt_process_details    ? 
 
_exptl_special_details 
; 
 ? 
; 
 
_diffrn_ambient_temperature       293(2) 
_diffrn_radiation_wavelength      0.71073 
_diffrn_radiation_type            MoK\a 
_diffrn_radiation_source          'fine-focus sealed tube' 
_diffrn_radiation_monochromator   graphite 
_diffrn_measurement_device_type   'Nonius KappaCCD area detector' 
_diffrn_measurement_method        ? 
_diffrn_detector_area_resol_mean  ? 
_diffrn_standards_number          ? 
_diffrn_standards_interval_count  ? 
_diffrn_standards_interval_time   ? 
_diffrn_standards_decay_%         ? 
_diffrn_reflns_number             6539 
_diffrn_reflns_av_R_equivalents   0.0000 
_diffrn_reflns_av_sigmaI/netI     0.0723 
_diffrn_reflns_limit_h_min        -11 
_diffrn_reflns_limit_h_max        11 
_diffrn_reflns_limit_k_min        -12 
_diffrn_reflns_limit_k_max        12 
_diffrn_reflns_limit_l_min        -44 
_diffrn_reflns_limit_l_max        44 
_diffrn_reflns_theta_min          4.12 
_diffrn_reflns_theta_max          25.03 
_reflns_number_total              6539 
_reflns_number_gt                 4698 
_reflns_threshold_expression      >2sigma(I) 
 
_computing_data_collection        ? 
_computing_cell_refinement        ? 
_computing_data_reduction         ? 
_computing_structure_solution     'SHELXS-97 (Sheldrick, 1990)' 
_computing_structure_refinement   'SHELXL-97 (Sheldrick, 1997)' 
_computing_molecular_graphics     ? 
_computing_publication_material   ? 
 
_refine_special_details 
; 
 Refinement of F^2^ against ALL reflections.  The weighted R-factor wR and 
 goodness of fit S are based on F^2^, conventional R-factors R are based 
 on F, with F set to zero for negative F^2^. The threshold expression of 
 F^2^ > 2sigma(F^2^) is used only for calculating R-factors(gt) etc. and is 
 not relevant to the choice of reflections for refinement.  R-factors based 
 on F^2^ are statistically about twice as large as those based on F, and R- 
 factors based on ALL data will be even larger. 
   The oxygen of the furanose ring was disordered and refined isotropically
 in two positions. Also, one t-butyl methyl carbons were disordered and they
 were refined isotropically in two positions. The hydrogens on the disordered
 carbons or the carbons attached to disordered atoms were not included in the
 calculations.
;
 
_refine_ls_structure_factor_coef  Fsqd  
_refine_ls_matrix_type            full 
_refine_ls_weighting_scheme       calc  
_refine_ls_weighting_details 
 'calc w=1/[\s^2^(Fo^2^)+(0.0859P)^2^+2.8858P] where P=(Fo^2^+2Fc^2^)/3' 
_atom_sites_solution_primary      direct 
_atom_sites_solution_secondary    difmap 
_atom_sites_solution_hydrogens    geom 
_refine_ls_hydrogen_treatment     constr 
_refine_ls_extinction_method      none 
_refine_ls_extinction_coef        ? 
_refine_ls_abs_structure_details 
 'Flack H D (1983), Acta Cryst. A39, 876-881' 
_refine_ls_abs_structure_Flack    -0.02(19) 
_refine_ls_number_reflns          6539 
_refine_ls_number_parameters      420 
_refine_ls_number_restraints      36 
_refine_ls_R_factor_all           0.1102 
_refine_ls_R_factor_gt            0.0733 
_refine_ls_wR_factor_ref          0.1837 
_refine_ls_wR_factor_gt           0.1649 
_refine_ls_goodness_of_fit_ref    1.033 
_refine_ls_restrained_S_all       1.070 
_refine_ls_shift/su_max           0.000 
_refine_ls_shift/su_mean          0.000 
 
loop_ 
 _atom_site_label 
 _atom_site_type_symbol 
 _atom_site_fract_x 
 _atom_site_fract_y 
 _atom_site_fract_z 
 _atom_site_U_iso_or_equiv 
 _atom_site_adp_type 
 _atom_site_occupancy 
 _atom_site_symmetry_multiplicity 
 _atom_site_calc_flag 
 _atom_site_refinement_flags 
 _atom_site_disorder_assembly 
 _atom_site_disorder_group 
P P 0.24655(13) 0.97159(12) 0.14181(3) 0.0392(3) Uani 1 1 d . . . 
F F 0.1567(3) 0.9582(3) 0.10623(6) 0.0469(7) Uani 1 1 d . . . 
O1 O 0.3300(9) 1.2299(9) 0.2260(2) 0.073(2) Uiso 0.50 1 d PD . . 
O1A O 0.3917(8) 1.2754(8) 0.2158(2) 0.066(2) Uiso 0.50 1 d PD . . 
O2 O 0.5369(4) 1.2385(5) 0.25858(12) 0.0872(15) Uani 1 1 d . . . 
O3 O 0.6347(4) 1.1276(4) 0.21366(9) 0.0638(11) Uani 1 1 d . . . 
O4 O 0.3351(3) 0.9805(3) 0.17898(8) 0.0419(8) Uani 1 1 d . . . 
O5 O 0.1944(3) 1.1193(3) 0.14389(9) 0.0517(9) Uani 1 1 d . . . 
O6 O 0.3829(3) 0.9464(3) 0.11968(7) 0.0398(7) Uani 1 1 d . . . 
O7 O 0.1655(3) 0.8554(3) 0.16023(8) 0.0408(8) Uani 1 1 d . . . 
C1 C 0.4346(7) 1.1683(7) 0.24200(16) 0.0760(19) Uani 1 1 d D . . 
C2 C 0.5037(5) 1.0730(5) 0.21707(13) 0.0522(13) Uani 1 1 d . . . 
H2 H 0.5050 0.9826 0.2262 0.063 Uiso 1 1 calc R . . 
C3 C 0.4294(5) 1.0848(5) 0.18230(12) 0.0445(12) Uani 1 1 d . . . 
H3 H 0.4930 1.0851 0.1624 0.053 Uiso 1 1 calc R . . 
C4 C 0.3564(7) 1.2168(6) 0.18518(17) 0.0749(19) Uani 1 1 d D . . 
C5 C 0.2098(6) 1.2010(6) 0.17507(16) 0.0659(16) Uani 1 1 d . . . 
H5A H 0.1609 1.1615 0.1946 0.079 Uiso 1 1 calc R . . 
H5B H 0.1708 1.2870 0.1706 0.079 Uiso 1 1 calc R . . 
C6 C 0.7372(9) 1.1204(7) 0.27140(17) 0.095(2) Uani 1 1 d . . . 
H6A H 0.7560 1.1727 0.2920 0.142 Uiso 1 1 calc R . . 
H6B H 0.8207 1.0897 0.2614 0.142 Uiso 1 1 calc R . . 
H6C H 0.6823 1.0464 0.2780 0.142 Uiso 1 1 calc R . . 
C7 C 0.6635(6) 1.2021(6) 0.24473(15) 0.0638(16) Uani 1 1 d . . . 
C8 C 0.7407(8) 1.3232(7) 0.23414(19) 0.095(2) Uani 1 1 d . . . 
H8A H 0.7612 1.3743 0.2548 0.143 Uiso 1 1 calc R . . 
H8B H 0.6868 1.3749 0.2182 0.143 Uiso 1 1 calc R . . 
H8C H 0.8232 1.2979 0.2226 0.143 Uiso 1 1 calc R . . 
C9 C 0.3953(4) 0.8747(4) 0.08748(11) 0.0330(10) Uani 1 1 d . . . 
C10 C 0.4366(4) 0.9392(5) 0.05668(11) 0.0388(11) Uani 1 1 d . . . 
C11 C 0.4543(5) 0.8602(5) 0.02740(12) 0.0420(11) Uani 1 1 d . . . 
H11 H 0.4806 0.9003 0.0064 0.050 Uiso 1 1 calc R . . 
C12 C 0.4357(5) 0.7252(5) 0.02728(12) 0.0414(11) Uani 1 1 d . . . 
C13 C 0.3968(4) 0.6670(5) 0.05912(12) 0.0412(11) Uani 1 1 d . . . 
H13 H 0.3845 0.5763 0.0599 0.049 Uiso 1 1 calc R . . 
C14 C 0.3758(4) 0.7392(4) 0.08960(11) 0.0370(10) Uani 1 1 d . . . 
C15 C 0.3350(4) 0.6729(5) 0.12402(12) 0.0401(11) Uani 1 1 d . . . 
H15 H 0.3605 0.7336 0.1430 0.048 Uiso 1 1 calc R . . 
C16 C 0.1805(4) 0.6556(4) 0.12656(11) 0.0354(10) Uani 1 1 d . . . 
C17 C 0.1179(5) 0.5465(5) 0.11197(11) 0.0434(11) Uani 1 1 d . . . 
H17 H 0.1706 0.4842 0.1004 0.052 Uiso 1 1 calc R . . 
C18 C -0.0205(5) 0.5266(5) 0.11401(12) 0.0414(11) Uani 1 1 d . . . 
C19 C -0.0940(5) 0.6223(5) 0.13160(13) 0.0493(13) Uani 1 1 d . . . 
H19 H -0.1870 0.6098 0.1332 0.059 Uiso 1 1 calc R . . 
C20 C -0.0415(5) 0.7351(5) 0.14702(12) 0.0433(11) Uani 1 1 d . . . 
C21 C 0.0993(4) 0.7488(4) 0.14320(12) 0.0381(11) Uani 1 1 d . . . 
C22 C 0.4642(5) 1.0886(5) 0.05457(12) 0.0469(12) Uani 1 1 d . . . 
C23 C 0.4606(5) 0.6424(5) -0.00656(13) 0.0519(13) Uani 1 1 d D . . 
C24 C -0.0930(5) 0.4066(5) 0.09898(14) 0.0512(13) Uani 1 1 d . . . 
C25 C -0.1315(5) 0.8325(6) 0.16695(15) 0.0581(14) Uani 1 1 d . . . 
C26 C 0.4118(5) 0.5449(5) 0.13093(13) 0.0508(13) Uani 1 1 d . . . 
H26A H 0.3828 0.5079 0.1530 0.076 Uiso 1 1 calc R . . 
H26B H 0.5071 0.5628 0.1319 0.076 Uiso 1 1 calc R . . 
H26C H 0.3939 0.4837 0.1122 0.076 Uiso 1 1 calc R . . 
C27 C 0.3379(8) 1.1688(6) 0.0616(2) 0.110(3) Uani 1 1 d . . . 
H27A H 0.3590 1.2609 0.0599 0.165 Uiso 1 1 calc R . . 
H27B H 0.3048 1.1495 0.0849 0.165 Uiso 1 1 calc R . . 
H27C H 0.2699 1.1468 0.0445 0.165 Uiso 1 1 calc R . . 
C28 C 0.5750(9) 1.1235(8) 0.08176(19) 0.114(3) Uani 1 1 d . . . 
H28A H 0.5939 1.2161 0.0806 0.171 Uiso 1 1 calc R . . 
H28B H 0.6557 1.0748 0.0765 0.171 Uiso 1 1 calc R . . 
H28C H 0.5442 1.1013 0.1051 0.171 Uiso 1 1 calc R . . 
C29 C 0.5219(8) 1.1298(6) 0.01955(17) 0.085(2) Uani 1 1 d . . . 
H29A H 0.5372 1.2232 0.0196 0.127 Uiso 1 1 calc R . . 
H29B H 0.4595 1.1078 0.0010 0.127 Uiso 1 1 calc R . . 
H29C H 0.6060 1.0849 0.0156 0.127 Uiso 1 1 calc R . . 
C30 C 0.0030(6) 0.3097(6) 0.08120(17) 0.0731(18) Uani 1 1 d . . . 
H30A H -0.0475 0.2361 0.0723 0.110 Uiso 1 1 calc R . . 
H30B H 0.0684 0.2793 0.0981 0.110 Uiso 1 1 calc R . . 
H30C H 0.0487 0.3526 0.0620 0.110 Uiso 1 1 calc R . . 
C31 C -0.2005(6) 0.4499(6) 0.07218(16) 0.0669(16) Uani 1 1 d . . . 
H31A H -0.2458 0.3737 0.0629 0.100 Uiso 1 1 calc R . . 
H31B H -0.1579 0.4970 0.0532 0.100 Uiso 1 1 calc R . . 
H31C H -0.2651 0.5061 0.0837 0.100 Uiso 1 1 calc R . . 
C32 C -0.1634(7) 0.3328(6) 0.12961(17) 0.0790(19) Uani 1 1 d . . . 
H32A H -0.2095 0.2569 0.1205 0.119 Uiso 1 1 calc R . . 
H32B H -0.2276 0.3903 0.1408 0.119 Uiso 1 1 calc R . . 
H32C H -0.0970 0.3054 0.1466 0.119 Uiso 1 1 calc R . . 
C33 C -0.0853(7) 0.8382(9) 0.20614(17) 0.100(2) Uani 1 1 d . . . 
H33A H -0.0872 0.7512 0.2161 0.151 Uiso 1 1 calc R . . 
H33B H -0.1453 0.8944 0.2192 0.151 Uiso 1 1 calc R . . 
H33C H 0.0050 0.8726 0.2074 0.151 Uiso 1 1 calc R . . 
C34 C -0.1298(7) 0.9672(6) 0.1505(2) 0.090(2) Uani 1 1 d . . . 
H34A H -0.1875 1.0250 0.1638 0.134 Uiso 1 1 calc R . . 
H34B H -0.1617 0.9617 0.1265 0.134 Uiso 1 1 calc R . . 
H34C H -0.0392 1.0010 0.1506 0.134 Uiso 1 1 calc R . . 
C35 C -0.2804(6) 0.7879(7) 0.1672(2) 0.097(3) Uani 1 1 d . . . 
H35A H -0.2870 0.7023 0.1779 0.146 Uiso 1 1 calc R . . 
H35B H -0.3137 0.7841 0.1434 0.146 Uiso 1 1 calc R . . 
H35C H -0.3334 0.8496 0.1806 0.146 Uiso 1 1 calc R . . 
C36 C 0.5989(12) 0.6748(17) -0.0227(5) 0.118(6) Uiso 0.50 1 d PD . . 
C37 C 0.3483(12) 0.6789(13) -0.0343(3) 0.086(4) Uiso 0.50 1 d PD . . 
C38 C 0.4478(14) 0.4945(11) 0.0005(4) 0.093(4) Uiso 0.50 1 d PD . . 
C36A C 0.3358(11) 0.5626(13) -0.0150(4) 0.086(4) Uiso 0.50 1 d PD . . 
C37A C 0.5786(11) 0.5413(12) 0.0010(3) 0.077(4) Uiso 0.50 1 d PD . . 
C38A C 0.5108(13) 0.7252(13) -0.0388(3) 0.082(4) Uiso 0.50 1 d PD . . 
 
loop_ 
 _atom_site_aniso_label 
 _atom_site_aniso_U_11 
 _atom_site_aniso_U_22 
 _atom_site_aniso_U_33 
 _atom_site_aniso_U_23 
 _atom_site_aniso_U_13 
 _atom_site_aniso_U_12 
P 0.0466(7) 0.0347(6) 0.0364(6) -0.0012(5) -0.0012(6) 0.0006(6) 
F 0.0484(14) 0.0499(16) 0.0425(14) -0.0009(13) -0.0059(12) -0.0008(14) 
O2 0.077(3) 0.101(4) 0.084(3) -0.060(3) 0.005(2) -0.009(3) 
O3 0.061(2) 0.077(3) 0.054(2) -0.0290(19) 0.0002(18) -0.007(2) 
O4 0.0530(18) 0.0356(17) 0.0372(17) -0.0037(14) -0.0048(15) -0.0029(16) 
O5 0.064(2) 0.0390(18) 0.052(2) -0.0031(16) -0.0049(17) 0.0090(17) 
O6 0.0434(17) 0.0393(19) 0.0367(16) -0.0028(14) -0.0019(13) -0.0063(15) 
O7 0.0470(18) 0.0335(18) 0.0419(18) -0.0063(14) 0.0021(15) -0.0022(16) 
C1 0.082(4) 0.086(5) 0.059(4) -0.043(3) -0.002(3) -0.013(4) 
C2 0.062(3) 0.050(3) 0.044(3) -0.011(2) -0.004(2) -0.008(3) 
C3 0.053(3) 0.040(3) 0.040(3) -0.004(2) -0.005(2) -0.005(2) 
C4 0.091(4) 0.050(4) 0.084(4) -0.021(3) -0.035(4) 0.010(3) 
C5 0.084(4) 0.046(3) 0.067(4) -0.015(3) -0.010(3) 0.018(3) 
C6 0.130(6) 0.089(5) 0.065(4) -0.014(4) -0.028(4) -0.005(5) 
C7 0.070(4) 0.064(4) 0.057(3) -0.028(3) -0.002(3) -0.011(3) 
C8 0.111(5) 0.084(5) 0.090(5) -0.013(4) -0.017(5) -0.027(5) 
C9 0.039(2) 0.031(3) 0.029(2) -0.0056(19) -0.0014(19) -0.003(2) 
C10 0.037(2) 0.041(3) 0.039(2) 0.001(2) -0.001(2) -0.004(2) 
C11 0.044(3) 0.045(3) 0.036(2) 0.002(2) 0.005(2) -0.002(2) 
C12 0.038(2) 0.042(3) 0.045(3) -0.003(2) 0.000(2) 0.000(2) 
C13 0.042(3) 0.032(3) 0.050(3) -0.003(2) -0.002(2) -0.001(2) 
C14 0.037(2) 0.037(3) 0.037(2) -0.001(2) 0.002(2) 0.001(2) 
C15 0.044(3) 0.038(3) 0.038(2) -0.001(2) 0.002(2) -0.002(2) 
C16 0.046(3) 0.025(2) 0.035(2) 0.0045(19) 0.003(2) -0.002(2) 
C17 0.051(3) 0.040(3) 0.040(3) -0.001(2) 0.004(2) -0.002(2) 
C18 0.044(3) 0.035(3) 0.045(3) 0.003(2) -0.001(2) -0.005(2) 
C19 0.039(3) 0.053(3) 0.055(3) 0.004(3) 0.002(2) -0.003(3) 
C20 0.046(3) 0.041(3) 0.043(3) 0.007(2) 0.001(2) 0.002(2) 
C21 0.042(3) 0.035(3) 0.037(2) 0.000(2) 0.001(2) -0.005(2) 
C22 0.058(3) 0.041(3) 0.041(3) -0.002(2) 0.006(2) -0.011(2) 
C23 0.058(3) 0.052(3) 0.046(3) -0.008(2) 0.009(2) -0.001(3) 
C24 0.056(3) 0.043(3) 0.056(3) 0.002(2) -0.006(3) -0.011(3) 
C25 0.056(3) 0.053(3) 0.065(4) -0.003(3) 0.017(3) 0.005(3) 
C26 0.052(3) 0.042(3) 0.058(3) 0.007(3) 0.001(2) 0.002(3) 
C27 0.126(6) 0.041(4) 0.162(8) 0.024(4) 0.065(6) 0.010(4) 
C28 0.160(8) 0.097(6) 0.084(5) 0.015(4) -0.028(5) -0.082(6) 
C29 0.129(6) 0.050(4) 0.075(4) 0.009(3) 0.032(4) -0.008(4) 
C30 0.074(4) 0.057(4) 0.089(5) -0.017(3) -0.015(3) -0.005(3) 
C31 0.068(4) 0.059(4) 0.074(4) 0.004(3) -0.024(3) -0.018(3) 
C32 0.093(5) 0.064(4) 0.080(4) 0.014(3) -0.011(4) -0.029(4) 
C33 0.100(5) 0.135(7) 0.066(4) -0.025(4) 0.026(4) 0.012(5) 
C34 0.084(4) 0.066(4) 0.119(6) -0.005(4) 0.033(4) 0.025(4) 
C35 0.054(4) 0.097(6) 0.141(7) -0.033(5) 0.035(4) 0.001(4) 
 
_geom_special_details 
; 
 All esds (except the esd in the dihedral angle between two l.s. planes) 
 are estimated using the full covariance matrix.  The cell esds are taken 
 into account individually in the estimation of esds in distances, angles 
 and torsion angles; correlations between esds in cell parameters are only 
 used when they are defined by crystal symmetry.  An approximate (isotropic) 
 treatment of cell esds is used for estimating esds involving l.s. planes. 
; 
 
loop_ 
 _geom_bond_atom_site_label_1 
 _geom_bond_atom_site_label_2 
 _geom_bond_distance 
 _geom_bond_site_symmetry_2 
 _geom_bond_publ_flag 
P F 1.617(3) . y 
P O4 1.658(3) . y 
P O5 1.589(3) . y 
P O6 1.607(3) . y 
P O7 1.587(3) . y 
O1 C1 1.352(9) . ? 
O1 C4 1.568(9) . ? 
O1A C4 1.348(8) . ? 
O1A C1 1.530(9) . ? 
O2 C1 1.387(7) . ? 
O2 C7 1.406(7) . ? 
O3 C2 1.415(6) . ? 
O3 C7 1.426(6) . ? 
O4 C3 1.417(5) . ? 
O5 C5 1.449(6) . ? 
O6 C9 1.423(5) . ? 
O7 C21 1.419(5) . ? 
C1 C2 1.514(7) . ? 
C2 C3 1.510(7) . ? 
C3 C4 1.526(7) . ? 
C4 C5 1.507(8) . ? 
C6 C7 1.495(9) . ? 
C7 C8 1.502(9) . ? 
C9 C14 1.392(6) . ? 
C9 C10 1.397(6) . ? 
C10 C11 1.378(6) . ? 
C10 C22 1.543(7) . ? 
C11 C12 1.384(7) . ? 
C12 C13 1.394(6) . ? 
C12 C23 1.550(7) . ? 
C13 C14 1.381(6) . ? 
C14 C15 1.519(6) . ? 
C15 C26 1.528(6) . ? 
C15 C16 1.540(6) . ? 
C16 C17 1.385(6) . ? 
C16 C21 1.391(6) . ? 
C17 C18 1.385(6) . ? 
C18 C19 1.384(7) . ? 
C18 C24 1.523(7) . ? 
C19 C20 1.387(7) . ? 
C20 C21 1.407(6) . ? 
C20 C25 1.529(7) . ? 
C22 C29 1.501(7) . ? 
C22 C27 1.515(8) . ? 
C22 C28 1.543(8) . ? 
C23 C36A 1.509(11) . ? 
C23 C38 1.531(11) . ? 
C23 C36 1.534(12) . ? 
C23 C38A 1.560(10) . ? 
C23 C37 1.571(11) . ? 
C23 C37A 1.581(10) . ? 
C24 C30 1.524(8) . ? 
C24 C31 1.533(7) . ? 
C24 C32 1.545(7) . ? 
C25 C34 1.504(8) . ? 
C25 C35 1.540(8) . ? 
C25 C33 1.551(9) . ? 
 
loop_ 
 _geom_angle_atom_site_label_1 
 _geom_angle_atom_site_label_2 
 _geom_angle_atom_site_label_3 
 _geom_angle 
 _geom_angle_site_symmetry_1 
 _geom_angle_site_symmetry_3 
 _geom_angle_publ_flag 
F P O4 177.70(17) . . y 
F P O5 86.71(17) . . y 
F P O6 90.86(15) . . y 
F P O7 91.41(16) . . y 
O4 P O5 94.47(17) . . y 
O4 P O6 90.37(16) . . y 
O4 P O7 86.29(16) . . y 
O5 P O6 116.65(18) . . y 
O5 P O7 121.09(18) . . y
O6 P O7 122.26(17) . . y 
C3 O4 P 117.6(3) . . y 
C5 O5 P 123.2(3) . . y 
C9 O6 P 126.8(3) . . y 
C21 O7 P 126.9(3) . . y 
C1 O1 C4 105.9(6) . . ? 
C4 O1A C1 108.3(6) . . ? 
C1 O2 C7 110.2(4) . . ? 
C2 O3 C7 108.4(4) . . ? 
O1 C1 O2 121.5(7) . . ? 
O1 C1 C2 111.2(6) . . ? 
O2 C1 C2 106.3(5) . . ? 
O2 C1 O1A 97.4(6) . . ? 
C2 C1 O1A 100.2(5) . . ? 
O3 C2 C3 109.6(4) . . ? 
O3 C2 C1 102.6(4) . . ? 
C3 C2 C1 105.8(5) . . ? 
O4 C3 C2 109.7(4) . . ? 
O4 C3 C4 110.6(4) . . ? 
C2 C3 C4 103.8(4) . . ? 
O1A C4 C5 120.9(6) . . ? 
O1A C4 C3 109.0(5) . . ? 
C5 C4 C3 110.1(4) . . ? 
C5 C4 O1 95.6(6) . . ? 
C3 C4 O1 102.9(5) . . ? 
O5 C5 C4 111.6(5) . . ? 
O2 C7 O3 105.6(4) . . ? 
O2 C7 C6 109.2(6) . . ? 
O3 C7 C6 111.0(5) . . ? 
O2 C7 C8 109.6(5) . . ? 
O3 C7 C8 108.5(5) . . ? 
C6 C7 C8 112.7(6) . . ? 
C14 C9 C10 123.5(4) . . ? 
C14 C9 O6 116.4(4) . . ? 
C10 C9 O6 119.8(4) . . ? 
C11 C10 C9 115.7(4) . . ? 
C11 C10 C22 120.5(4) . . ? 
C9 C10 C22 123.8(4) . . ? 
C10 C11 C12 124.2(4) . . ? 
C11 C12 C13 117.0(4) . . ? 
C11 C12 C23 121.3(4) . . ? 
C13 C12 C23 121.8(4) . . ? 
C14 C13 C12 122.4(4) . . ? 
C13 C14 C9 117.1(4) . . ? 
C13 C14 C15 121.3(4) . . ? 
C9 C14 C15 121.6(4) . . ? 
C14 C15 C26 113.0(4) . . ? 
C14 C15 C16 111.5(4) . . ? 
C26 C15 C16 112.7(4) . . ? 
C17 C16 C21 117.8(4) . . ? 
C17 C16 C15 120.7(4) . . ? 
C21 C16 C15 121.5(4) . . ? 
C16 C17 C18 122.5(5) . . ? 
C19 C18 C17 116.3(4) . . ? 
C19 C18 C24 119.6(4) . . ? 
C17 C18 C24 124.1(5) . . ? 
C18 C19 C20 125.9(4) . . ? 
C19 C20 C21 114.2(4) . . ? 
C19 C20 C25 121.6(4) . . ? 
C21 C20 C25 124.3(4) . . ? 
C16 C21 C20 123.4(4) . . ? 
C16 C21 O7 117.3(4) . . ? 
C20 C21 O7 119.0(4) . . ? 
C29 C22 C27 108.6(5) . . ? 
C29 C22 C10 112.8(4) . . ? 
C27 C22 C10 112.0(4) . . ? 
C29 C22 C28 104.6(5) . . ? 
C27 C22 C28 110.1(6) . . ? 
C10 C22 C28 108.5(5) . . ? 
C38 C23 C36 110.7(8) . . ? 
C36A C23 C12 109.6(6) . . ? 
C38 C23 C12 112.1(7) . . ? 
C36 C23 C12 110.8(8) . . ? 
C36A C23 C38A 112.7(7) . . ? 
C38 C23 C38A 133.7(9) . . ? 
C12 C23 C38A 113.7(6) . . ? 
C38 C23 C37 106.8(7) . . ? 
C36 C23 C37 108.2(7) . . ? 
C12 C23 C37 108.1(6) . . ? 
C36A C23 C37A 107.0(7) . . ? 
C12 C23 C37A 108.7(6) . . ? 
C38A C23 C37A 104.8(6) . . ? 
C37 C23 C37A 142.7(8) . . ? 
C18 C24 C30 112.8(4) . . ? 
C18 C24 C31 110.1(4) . . ? 
C30 C24 C31 109.0(5) . . ? 
C18 C24 C32 108.7(4) . . ? 
C30 C24 C32 107.4(5) . . ? 
C31 C24 C32 108.8(5) . . ? 
C34 C25 C20 112.2(4) . . ? 
C34 C25 C35 106.3(5) . . ? 
C20 C25 C35 111.7(5) . . ? 
C34 C25 C33 111.0(6) . . ? 
C20 C25 C33 108.9(5) . . ? 
C35 C25 C33 106.6(5) . . ? 
 
_diffrn_measured_fraction_theta_max    0.989 
_diffrn_reflns_theta_full              25.03 
_diffrn_measured_fraction_theta_full   0.989 
_refine_diff_density_max    0.421 
_refine_diff_density_min   -0.359 
_refine_diff_density_rms    0.051 
